# Supplementary material for: GIS-Based RUSLE Reservoir Sedimentation Estimates: Temporally Variable C-Factors, Sediment Delivery Ratio, and Adjustment for Stream Channel and Bank Sediment Sources
Source: MDPI journal article supplement (doi:10.3390/land12101913), 2023-10-12
Supplement: s1 [file s1]

## Supplemental Material

Table S1. Sinuosity ( $S_{sn}$ ) values and their interpretation.

| $S_{sn}$    | Interpretation |
|-------------|----------------|
| 1.0 - 1.05  | Straight       |
| 1.06 - 1.30 | Low Sinuosity  |
| 1.31 - 3.0  | Meandering     |

Adapted from Schumm [45].

Table S2. Bank height ratio (BHR) values with accompanying stability assignment.

| BHR  | Stability Category |
|------|--------------------|
| 1.0  | Stable             |
| 1.1  | Moderately Stable  |
| 1.45 | Unstable           |
| 1.63 | Highly Unstable    |

Adapted from NMSU [46].

Table S3. Bank height (BH) and Bank Angle (BA) values with accompanying category assignment.

| BH (m)    | BA (deg) | Category  |
|-----------|----------|-----------|
| 1.0-1.1   | 0-20     | Very Low  |
| 1.11-1.19 | 21-60    | Low       |
| 1.2-1.5   | 61-80    | Medium    |
| 1.6-2.0   | 81-90    | High      |
| 2.1-2.8   | 91-119   | Very High |
| > 2.8     | > 119    | Extreme   |

Adpated from Rosgen [34].

Table S4. Entrenchment ratio (ER) and Bank Full width:Bank Full Depth ratio (BFW:BFD) values with accompanying category assignment.

| ER      |                       | BFW:BFD |                  |
|---------|-----------------------|---------|------------------|
| Value   | Category              | Value   | Category         |
| < 1.4   | Entrenched            | < 12    | Low              |
|         |                       | > 12    | Moderate to High |
| 1.4-2.2 | Moderately Entrenched | > 12    | Moderate         |
| > 2.2   | Slightly Entrenched   | < 12    | Very Low         |
|         |                       | > 12    | Moderate to High |

Adapted from USDA [47].

Table S5. Year, satellite sensor, horizontal spatial resolution, and classification schemes used to develop land cover/C-factor data.

| Year | Satellite Sensor | Spatial Resolution (m) | Classification Scheme |
|------|------------------|------------------------|-----------------------|
| 1981 | Landsat MSS      | 80                     | Unsupervised          |
| 1985 | Landsat TM       | 30                     | Unsupervised          |
| 1989 | Landsat TM       | 30                     | Unsupervised          |
| 1994 | Landsat TM       | 30                     | Unsupervised          |
| 1997 | Landsat TM       | 30                     | Supervised            |

Table S6. Mean, maximum, minimum, and standard deviation as decimal percents of watershed area in either Crop, Fallow, Grass, or Tree/Shrub.

| Statistic              | Crop  | Fallow | Grass  | Tree/Shrub |
|------------------------|-------|--------|--------|------------|
| Watershed/Reservoir 11 |       |        |        |            |
| Mean                   | 0.084 | 0.015  | 0.815  | 0.077      |
| Std. Deviation         | 0.063 | 0.020  | 0.072  | 0.038      |
| Maximum                | 0.158 | 0.051  | 0.901  | 0.126      |
| Minimum                | 0.010 | 0      | 0.721  | 0.029      |
| Watershed/Reservoir 14 |       |        |        |            |
| Mean                   | 0.089 | 0.013  | 0.709  | 0.062      |
| Std. Deviation         | 0.490 | 0.017  | 0.051  | 0.041      |
| Maximum                | 0.156 | 0.042  | 0.775  | 0.139      |
| Minimum                | 0.018 | 0      | 0.651  | 0          |
| Watershed/Reservoir 20 |       |        |        |            |
| Mean                   | 0.092 | 0.003  | 0.723  | 0.170      |
| Std. Deviation         | 0.104 | 0.006  | 0.149  | 0.085      |
| Maximum                | 0.317 | 0.017  | 0.958  | 0.285      |
| Minimum                | 0.015 | 0      | 0.459  | 0.016      |
| Watershed/Reservoir 21 |       |        |        |            |
| Mean                   | 0.111 | 0.004  | 0.824  | 0.052      |
| Std. Deviation         | 0.080 | 0.008  | 0.074  | 0.048      |
| Maximum                | 0.269 | 0.020  | 0.911  | 0.155      |
| Minimum                | 0.035 | 0      | 0.688  | 0.007      |
| Watershed/Reservoir 22 |       |        |        |            |
| Mean                   | 0.209 | 0.012  | 0.649  | 0.102      |
| Std. Deviation         | 0.046 | 0.024  | 0.046  | 0.027      |
| Maximum                | 0.263 | 0.062  | 0.722  | 0.143      |
| Minimum                | 0.127 | 0      | 0.585  | 0.058      |
| Watershed/Reservoir 23 |       |        |        |            |
| Mean                   | 0.375 | 0.001  | 0.571  | 0.023      |
| Std. Deviation         | 0.106 | 0.003  | 0.0964 | 0.014      |
| Maximum                | 0.506 | 0.009  | 0.712  | 0.044      |
| Minimum                | 0.216 | 0      | 0.457  | 0.007      |
| Watershed/Reservoir 24 |       |        |        |            |
| Mean                   | 0.389 | 0.005  | 0.558  | 0.058      |
| Std. Deviation         | 0.097 | 0.011  | 0.094  | 0.019      |
| Maximum                | 0.471 | 0.030  | 0.752  | 0.088      |
| Minimum                | 0.179 | 0      | 0.479  | 0.035      |
| Watershed/Reservoir 26 |       |        |        |            |
| Mean                   | 0.423 | 0.003  | 0.537  | 0.010      |
| Std. Deviation         | 0.055 | 0.006  | 0.054  | 0.003      |
| Maximum                | 0.523 | 0.016  | 0.606  | 0.016      |
| Minimum                | 0.348 | 0      | 0.435  | 0.006      |
| Watershed/Reservoir 31 |       |        |        |            |
| Mean                   | 0.157 | 0.011  | 0.634  | 0.172      |
| Std. Deviation         | 0.023 | 0.012  | 0.038  | 0.031      |
| Maximum                | 0.184 | 0.029  | 0.670  | 0.232      |
| Minimum                | 0.128 | 0      | 0.560  | 0.148      |

61  
62  
63  
64

65  
66

Table S6. Continued.

| Statistic              | Crop  | Fallow | Grass | Tree/Shrub |
|------------------------|-------|--------|-------|------------|
| Watershed/Reservoir 39 |       |        |       |            |
| Mean                   | 0.076 | 0.007  | 0.760 | 0.134      |
| Std. Deviation         | 0.056 | 0.008  | 0.107 | 0.056      |
| Maximum                | 0.180 | 0.017  | 0.861 | 0.240      |
| Minimum                | 0.024 | 0      | 0.556 | 0.076      |
| Watershed/Reservoir 41 |       |        |       |            |
| Mean                   | 0.070 | 0.006  | 0.723 | 0.174      |
| Std. Deviation         | 0.036 | 0.008  | 0.087 | 0.055      |
| Maximum                | 0.120 | 0.019  | 0.854 | 0.266      |
| Minimum                | 0.021 | 0      | 0.595 | 0.100      |
| Watershed/Reservoir 42 |       |        |       |            |
| Mean                   | 0.077 | 0.005  | 0.783 | 0.105      |
| Std. Deviation         | 0.039 | 0.008  | 0.042 | 0.030      |
| Maximum                | 0.121 | 0.022  | 0.842 | 0.150      |
| Minimum                | 0.003 | 0      | 0.712 | 0.077      |

Table S7. Watershed basin relief ( $W_{rlf}$ ), percentage of watershed having slopes  $\geq 21^\circ$  ( $\%W_{slope\geq 21}$ ), watershed valley length ( $W_{vl}$ ), stream thalweg length ( $S_{thal}$ ), stream slope ( $S_{slope}$ ), and stream sinuosity ( $S_{sn}$ ) for each watershed.

| Watershed Variables |                  |                      |                 | Stream Variables  |                      |          |
|---------------------|------------------|----------------------|-----------------|-------------------|----------------------|----------|
| ID                  | $W_{rlf}$<br>(m) | $\%W_{slope\geq 21}$ | $W_{vl}$<br>(m) | $S_{thal}$<br>(m) | $S_{slope}$<br>(m/m) | $S_{sn}$ |
| 11                  | 70.0             | 3.4                  | 5163            | 5258              | 0.013                | 1.02     |
| 14                  | 62.6             | 0.4                  | 4475            | 4691              | 0.013                | 1.05     |
| 20                  | 44.8             | 1.2                  | 3392            | 4204              | 0.011                | 1.24     |
| 21                  | 38.0             | 0.9                  | 1761            | 1844              | 0.021                | 1.05     |
| 22                  | 38.3             | 9.7                  | 1820            | 2279              | 0.017                | 1.25     |
| 23                  | 40.9             | 1.3                  | 2821            | 3544              | 0.012                | 1.26     |
| 24                  | 56.2             | 1.6                  | 4700            | 6115              | 0.010                | 1.30     |
| 26                  | 49.7             | 0.8                  | 11002           | 13196             | 0.004                | 1.20     |
| 31                  | 77.8             | 3.0                  | 8770            | 9749              | 0.008                | 1.11     |
| 39                  | 48.1             | 0.3                  | 3525            | 3888              | 0.012                | 1.10     |
| 41                  | 39.2             | 0.3                  | 2193            | 2268              | 0.017                | 1.03     |
| 42                  | 50.1             | 0.7                  | 2156            | 2227              | 0.022                | 1.03     |



Table S8. Percentage of 100-m stream buffer area having slopes  $\geq 21^\circ$  ( $\%Cor_{slope \geq 21}$ ), ratio of  $\%Cor_{slope \geq 21}$  to  $W_{VL}$  ( $Cor_{slope \geq 21}:W_{VL}$ ), and percentage of buffer area with low, moderate, or high K-factor soils ( $\%Cor_{LK}$ ,  $\%Cor_{MK}$ ,  $\%Cor_{HK}$ ) for each watershed.

| Watershed |                         |                              |              |              |              |
|-----------|-------------------------|------------------------------|--------------|--------------|--------------|
| ID        | $\%Cor_{slope \geq 21}$ | $Cor_{slope \geq 21}:W_{VL}$ | $\%Cor_{LK}$ | $\%Cor_{MK}$ | $\%Cor_{HK}$ |
| 11        | 3.7                     | 3.35                         | 70.6         | 29.3         | 0.0          |
| 14        | 1.2                     | 2.15                         | 100.0        | 0.0          | 0.0          |
| 20        | 5.6                     | 8.10                         | 52.7         | 47.1         | 0.14         |
| 21        | 36.8                    | 13.19                        | 25.1         | 74.9         | 0.0          |
| 22        | 8.9                     | 36.77                        | 12.2         | 83.0         | 4.8          |
| 23        | 13.9                    | 8.94                         | 10.3         | 89.0         | 0.7          |
| 24        | 7.0                     | 17.97                        | 5.8          | 84.2         | 10.0         |
| 26        | 4.8                     | 9.86                         | 0.3          | 73.8         | 25.9         |
| 31        | 34.7                    | 5.27                         | 12.0         | 83.0         | 5.0          |
| 39        | 0.6                     | 1.96                         | 87.0         | 13.1         | 0.0          |
| 41        | 8.4                     | 1.75                         | 100.0        | 0.0          | 0.0          |
| 42        | 9.7                     | 4.21                         | 95.0         | 3.2          | 1.8          |
| 11        | 3.7                     | 3.35                         | 70.6         | 29.3         | 0.0          |

Table S9. Within-channel, stream segment weighted values of bank full depth (BFD), bank full width (BFW), ratio of BFW to BFD (BFW:BFD), entrenchment ratio (ER), bank angle (BA), bank height ratio (BHR), channel depth (CD), channel width (CW), ratio of CW to CD (CW:CD), channel cross-sectional area (CA), and horizontal stream surface area as a percentage of watershed drainage area ( $FWA_{\%W_A}$ ) for each watershed.

| Watershed<br>ID | BFD<br>(m) | BFW<br>(m) | BFW: |      | BA<br>(deg) | BHR  | CD<br>(m) | CW<br>(m) | CW<br>: |       | FWA<br>_%W<br>_A |
|-----------------|------------|------------|------|------|-------------|------|-----------|-----------|---------|-------|------------------|
|                 |            |            | BFD  | ER   |             |      |           |           | CD      | CA    |                  |
| 11              | 0.34       | 28.1       | 99.3 | 1.91 | 12.9        | 3.57 | 1.5       | 37.1      | 34.6    | 34.5  | 4.0              |
| 14              | 0.33       | 11.4       | 41.2 | 3.31 | 11.5        | 5.37 | 1.7       | 33.7      | 38.1    | 21.6  | 1.5              |
| 20              | 0.57       | 14.6       | 33.3 | 2.10 | 17.1        | 5.82 | 3.3       | 36.5      | 15.3    | 88.8  | 2.3              |
| 21              | 0.68       | 17.7       | 24.0 | 1.97 | 20.1        | 3.57 | 3.5       | 30.5      | 10.1    | 104.3 | 2.2              |
| 22              | 0.81       | 10.8       | 15.0 | 2.10 | 26.1        | 7.03 | 5.1       | 40.3      | 8.4     | 117.9 | 3.2              |
| 23              | 0.83       | 9.6        | 12.5 | 2.97 | 16.1        | 5.07 | 40.1      | 13.1      | 98.0    | 98.0  | 5.7              |
| 24              | 0.67       | 19.1       | 66.0 | 1.56 | 16.7        | 7.78 | 3.5       | 40.5      | 23.4    | 133.8 | 3.5              |
| 26              | 0.60       | 8.7        | 23.0 | 1.82 | 17.8        | 5.33 | 3.4       | 25.3      | 10.7    | 72.3  | 1.9              |
| 31              | 1.29       | 14.6       | 12.9 | 2.88 | 18.7        | 3.22 | 5.3       | 46.9      | 9.8     | 155.7 | 2.4              |
| 39              | 0.41       | 22.6       | 82.4 | 8.94 | 7.1         | 2.30 | 1.1       | 70.5      | 129.2   | 60.9  | 4.4              |
| 41              | 0.47       | 24.2       | 64.0 | 8.94 | 7.3         | 1.62 | 1.1       | 37.5      | 40.6    | 41.2  | 4.2              |
| 42              | 0.22       | 3.8        | 13.5 | 3.55 | 6.8         | 2.88 | 1.2       | 16.3      | 9.1     | 16.9  | 1.9              |

Table S10. Within-channel, stream segment weighted values of weighted soil sand and silt fractions ( $IC_{Sa}$  and  $IC_{Si}$ , respectively), percent of streambed and streambank soils that have low, moderate, or high K-factors ( $\%IC_{LK}$ ,  $\%IC_{MK}$ , and  $\%IC_{HK}$ ), a weighted K-factor value  $IC_K$ , and the plasticity index ( $IC_{PI}$ ) for each watershed.

| Watershed |           |           |             |             |             |        |           |
|-----------|-----------|-----------|-------------|-------------|-------------|--------|-----------|
| ID        | $IC_{Sa}$ | $IC_{Si}$ | $\%IC_{LK}$ | $\%IC_{MK}$ | $\%IC_{HK}$ | $IC_K$ | $IC_{PI}$ |
| 11        | 55.0      | 29.0      | 62.9        | 36.6        | 0.4         | 0.27   | 8.2       |
| 14        | 65.0      | 19.0      | 100.0       | 0.0         | 0.0         | 0.20   | 6.4       |
| 20        | 53.0      | 24.0      | 56.6        | 36.9        | 0.4         | 0.26   | 8.4       |
| 21        | 54.0      | 30.0      | 44.3        | 55.7        | 0.0         | 0.26   | 11.8      |
| 22        | 41.0      | 35.0      | 3.5         | 96.2        | 0.3         | 0.35   | 7.9       |
| 23        | 45.0      | 33.0      | 33.3        | 66.7        | 0.0         | 0.32   | 10.7      |
| 24        | 48.0      | 33.0      | 8.1         | 91.9        | 0.0         | 0.33   | 10.6      |
| 26        | 15.0      | 56.0      | 0.4         | 99.6        | 0.0         | 0.38   | 17.3      |
| 31        | 59.0      | 30.0      | 37.6        | 62.2        | 0.2         | 0.31   | 9.5       |
| 39        | 63.0      | 21.0      | 80.9        | 19.1        | 0.0         | 0.22   | 6.3       |
| 41        | 61.0      | 18.0      | 100.0       | 0.0         | 0.0         | 0.19   | 4.6       |
| 42        | 62.0      | 20.0      | 98.2        | 1.8         | 0.0         | 0.20   | 6.3       |

Table S11. Normalized difference of estimated reservoir sedimentation with first-order adjustment for stream channel, stream bank, and gully contributions of sediment ( $ND_{Res\_adj}$ ) from GIS-based RUSLE model simulations using the USDA [41] and Garbrecht [39] sediment delivery ratios (SDR) for each watershed (ID) in Group 2. The change in  $ND_{Res\_adj}$  ( $\Delta ND_{Res\_adj}$ ) between the two is also shown.

| Watershed ID | $ND_{Res\_adj}$ (%) |                     | $\Delta ND_{Res\_adj}$ (%) |
|--------------|---------------------|---------------------|----------------------------|
|              | Using USDA SDR      | Using Garbrecht SDR |                            |
| 14           | -75.4               | -63.3               | +12.1                      |
| 20           | -76.3               | -54.8               | +21.5                      |
| 21           | -66.6               | -50.8               | +15.8                      |
| 31           | -62.5               | -27.9               | +34.6                      |
| 39           | -61.5               | -35.6               | +25.9                      |
| 41           | -49.0               | 24.3                | +73.3                      |
| 42           | -64.8               | 18.7                | +83.5                      |

Table S12. Root mean square error (RMSE), multiple coefficient of determination (R<sup>2</sup>), and adjusted R<sup>2</sup> for alternative linear regression models. The P-value for each model is also shown.

| # Model Variables | Variable(s) Used                                                              | RMSE (%) | R <sup>2</sup> | Adjusted R <sup>2</sup> | P-value  |
|-------------------|-------------------------------------------------------------------------------|----------|----------------|-------------------------|----------|
| 1                 | IC <sub>K</sub>                                                               | 12.1     | 0.397          | ---                     | 0.0281   |
| 1                 | WS <sub>K</sub>                                                               | 11.7     | 0.429          | ---                     |          |
| 2                 | IC <sub>Si</sub> , FWA_%W <sub>A</sub>                                        | 8.8      | 0.710          | 0.640                   | 0.0038   |
| 2                 | WS <sub>HK</sub> , FWA_%W <sub>A</sub>                                        | 8.2      | 0.749          | 0.694                   |          |
| 3                 | IC <sub>K</sub> , FWA_%W <sub>A</sub> , BFD                                   | 7.1      | 0.834          | 0.772                   | 0.0017   |
| 3                 | W <sub>A</sub> , WS <sub>LK</sub> , W <sub>vl</sub>                           | 6.6      | 0.858          | 0.804                   |          |
| 4                 | IC <sub>K</sub> , FWA_%W <sub>A</sub> , ER, CD                                | 5.2      | 0.923          | 0.879                   | 0.0005   |
| 4                 | W <sub>A</sub> , W <sub>rlf</sub> , FWA_%W <sub>A</sub> , IC <sub>Sa</sub>    | 3.4      | 0.967          | 0.947                   |          |
| 5                 | IC <sub>K</sub> , FWA_%W <sub>A</sub> , CA, CW, IC <sub>Sa</sub>              | 3.1      | 0.976          | 0.955                   | < 0.0001 |
| 5                 | W <sub>A</sub> , WS <sub>K</sub> , S <sub>slope</sub> , S <sub>sn</sub> , BHR | 1.1      | 0.997          | 0.944                   |          |

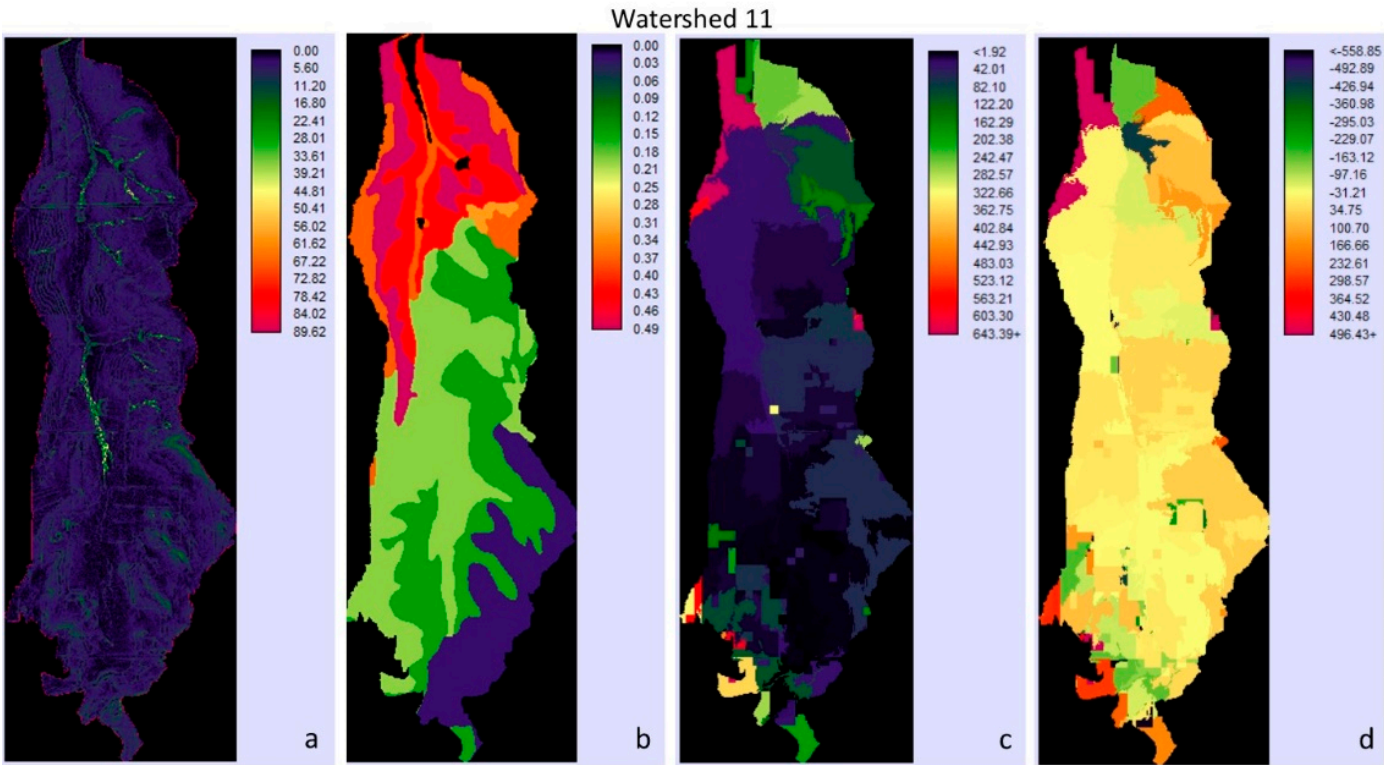

Figure S1. Watershed 11 GIS images of a) slope (deg), b) K-factor [(metric ton\*ha\*hr)/(ha\*MJ\*mm)], c) RUSLE total annual soil loss for each patch (metric tons yr<sup>-1</sup>), and d) SEDIMENTATION net annual soil loss for each patch (metric tons yr<sup>-1</sup>). The total soil loss and net soil loss images are for 1981.

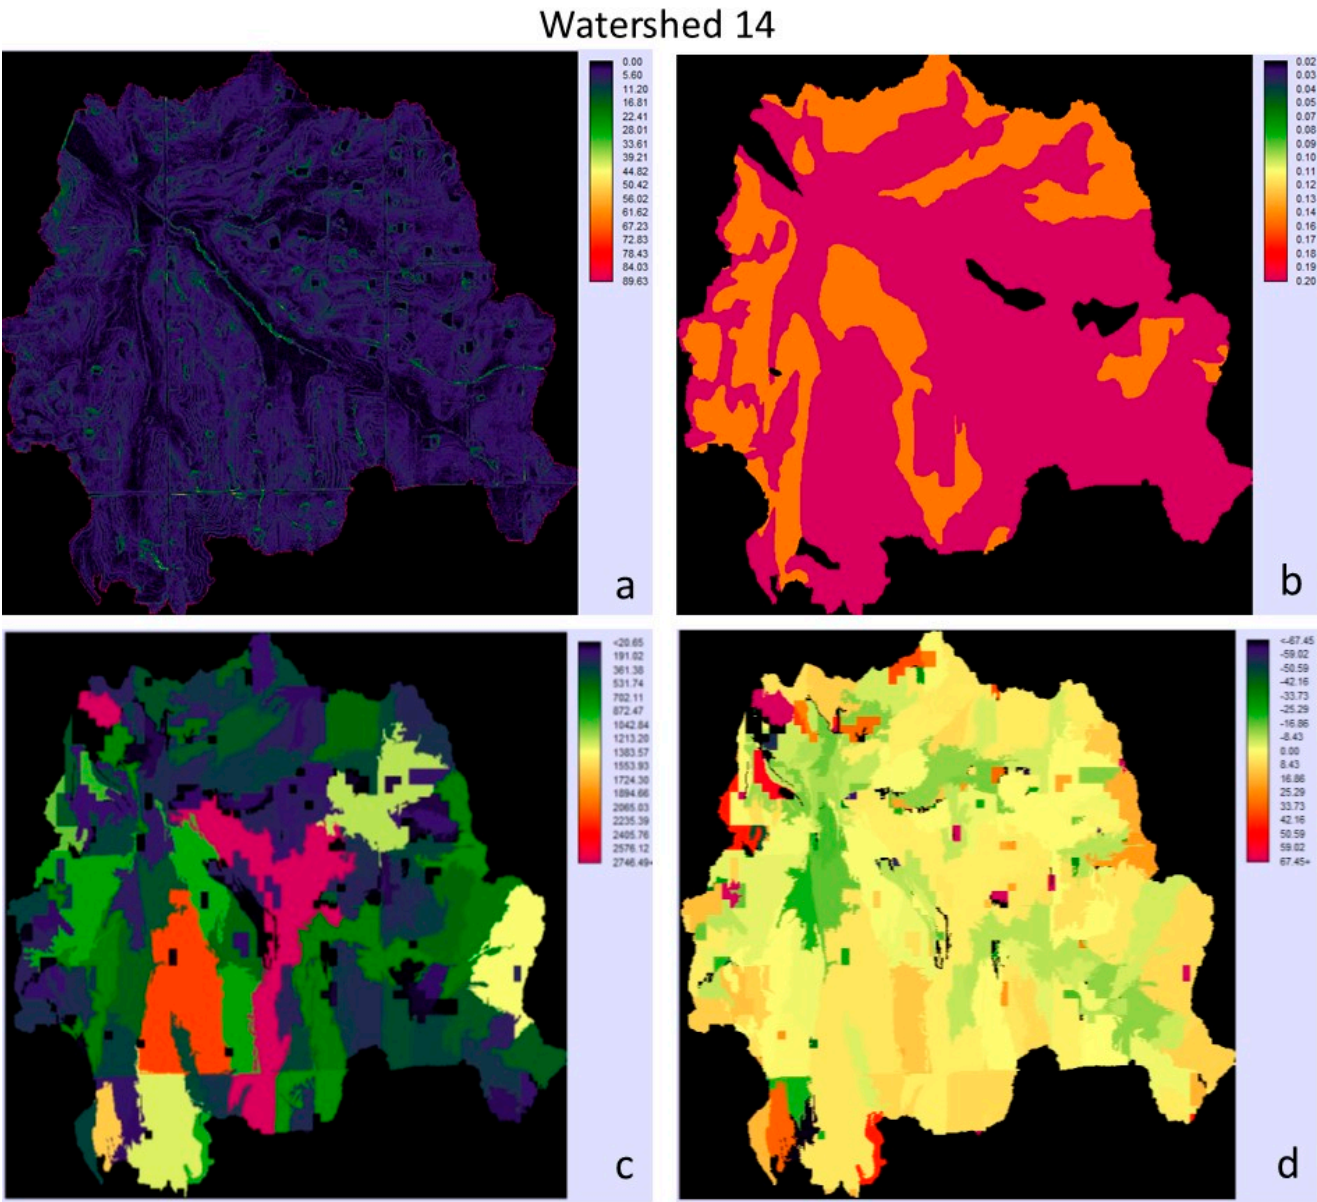

Figure S2. Watershed 14 GIS images of a) slope (deg), b) K-factor  $[(\text{metric ton} \cdot \text{ha} \cdot \text{hr}) / (\text{ha} \cdot \text{M} \cdot \text{mm})]$ , c) RUSLE total annual soil loss for each patch (metric tons  $\text{yr}^{-1}$ ), and d) SEDIMENTATION net annual soil loss for each patch (metric tons  $\text{yr}^{-1}$ ). The total soil loss and net soil loss images are for 1981.

Watershed 20

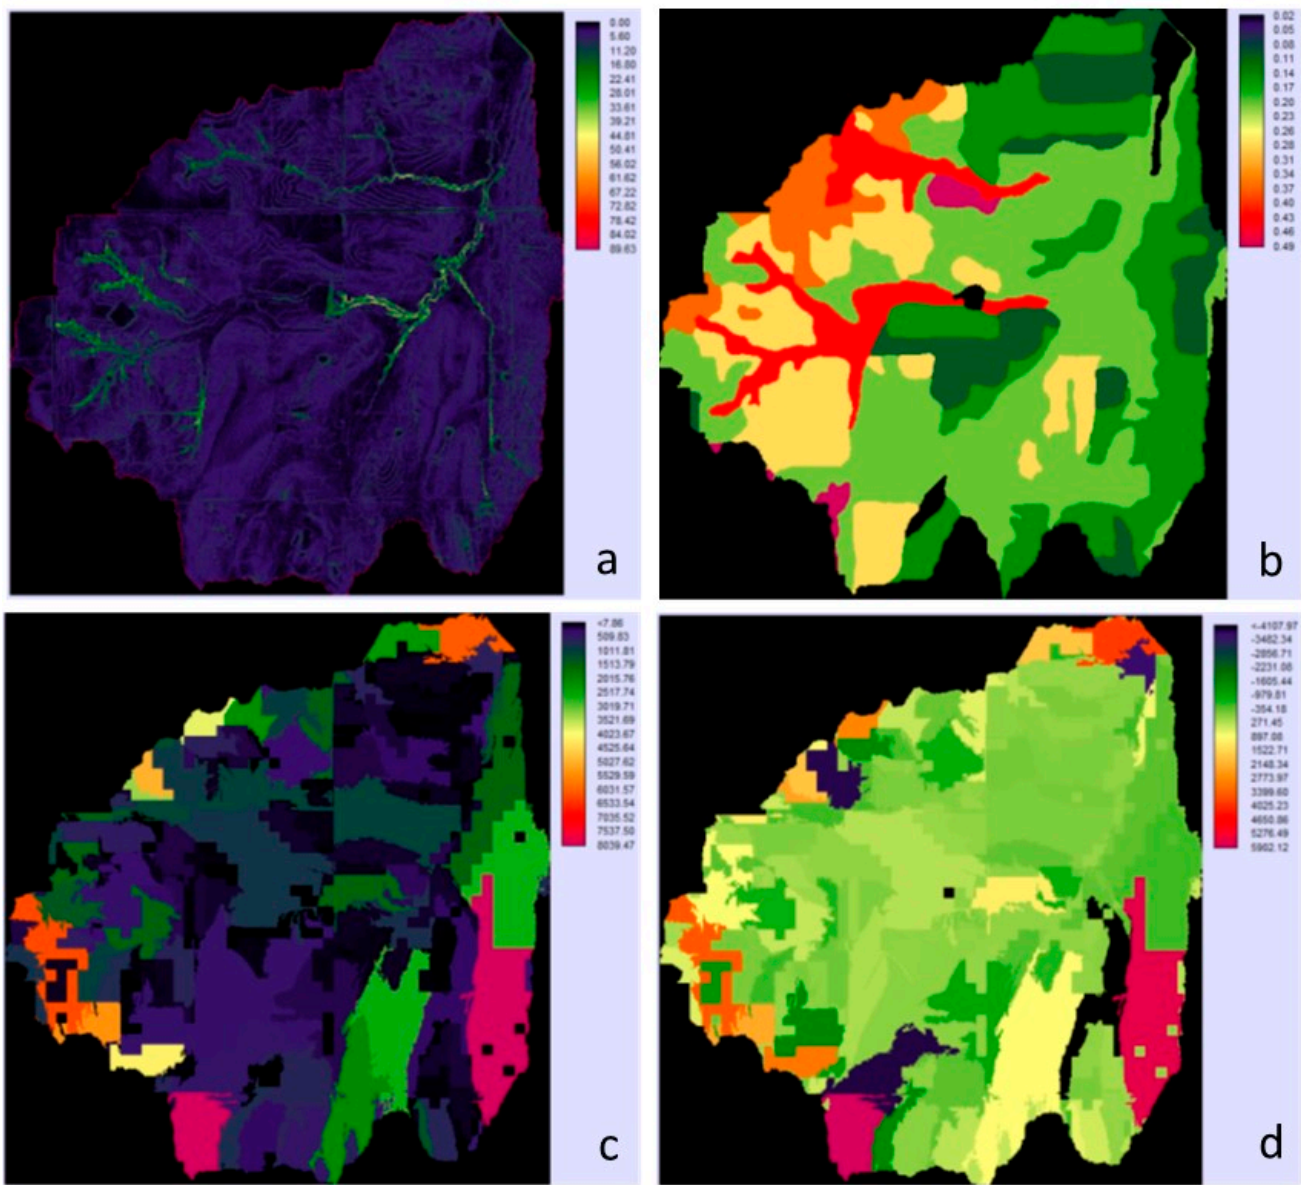

Figure S3. Watershed 20 GIS images of a) slope (deg), b) K-factor [(metric ton\*ha\*hr)/(ha\*MJ\*mm)], c) RUSLE total annual soil loss for each patch (metric tons yr<sup>-1</sup>), and d) SEDIMENTATION net annual soil loss for each patch (metric tons yr<sup>-1</sup>). The total soil loss and net soil loss images are for 1981.

142  
143  
144  
145  
146



Watershed 21

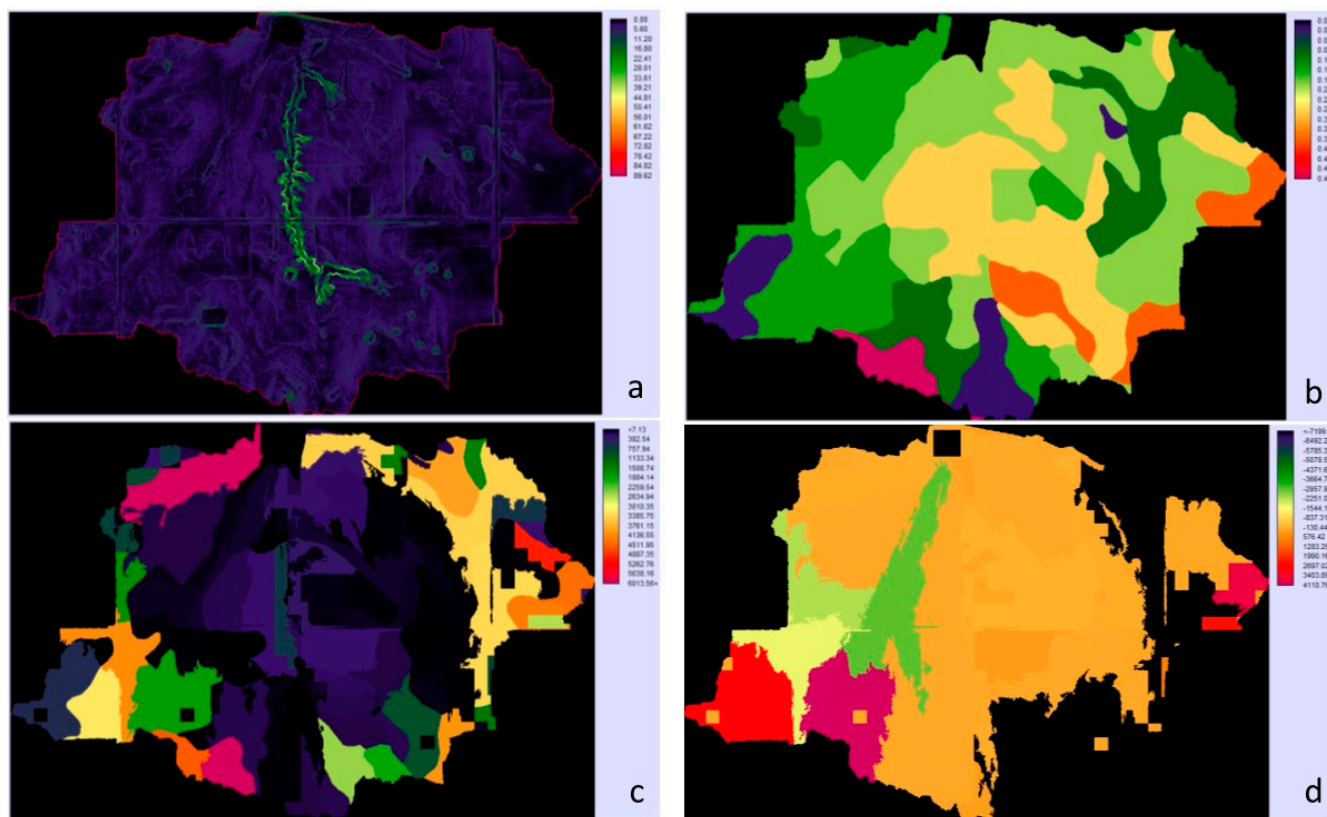

Figure S4. Watershed 21 GIS images of a) slope (deg), b) K-factor  $[(\text{metric ton} \cdot \text{ha} \cdot \text{hr}) / (\text{ha} \cdot \text{M}) \cdot \text{mm}]$ , c) RUSLE total annual soil loss for each patch (metric tons  $\text{yr}^{-1}$ ), and d) SEDIMENTATION net annual soil loss for each patch (metric tons  $\text{yr}^{-1}$ ). The total soil loss and net soil loss images are for 1981.

147

148

149

150

151

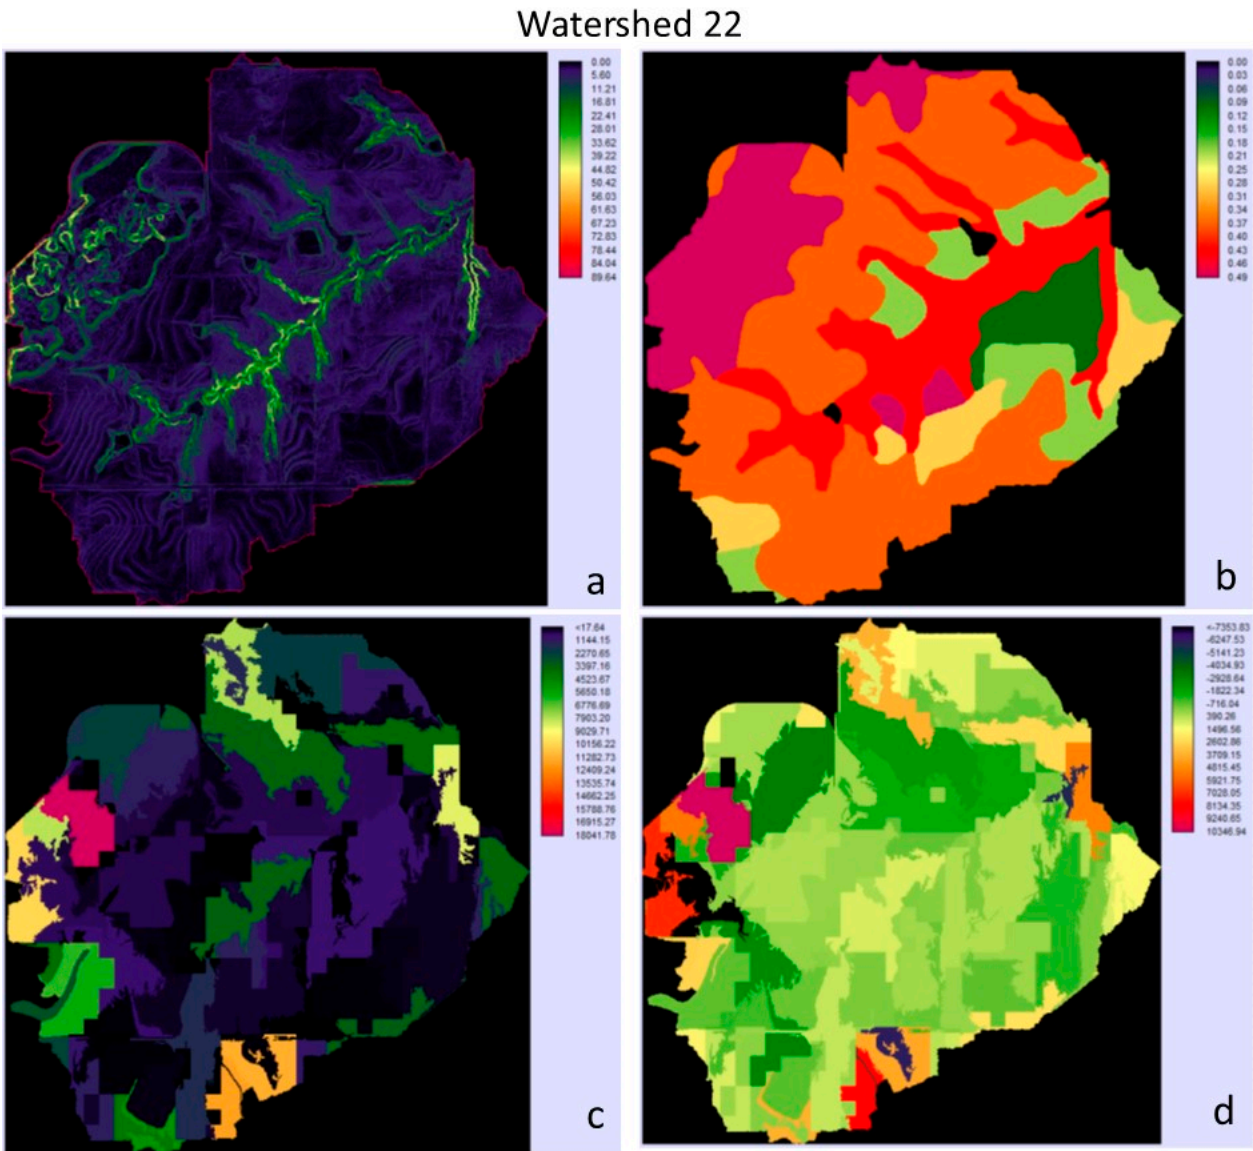

Figure S5. Watershed 22 GIS images of a) slope (deg), b) K-factor  $[(\text{metric ton} \cdot \text{ha} \cdot \text{hr}) / (\text{ha} \cdot \text{MJ} \cdot \text{mm})]$ , c) RUSLE total annual soil loss for each patch (metric tons  $\text{yr}^{-1}$ ), and d) SEDIMENTATION net annual soil loss for each patch (metric tons  $\text{yr}^{-1}$ ). The total soil loss and net soil loss images are for 1981.

Watershed 23

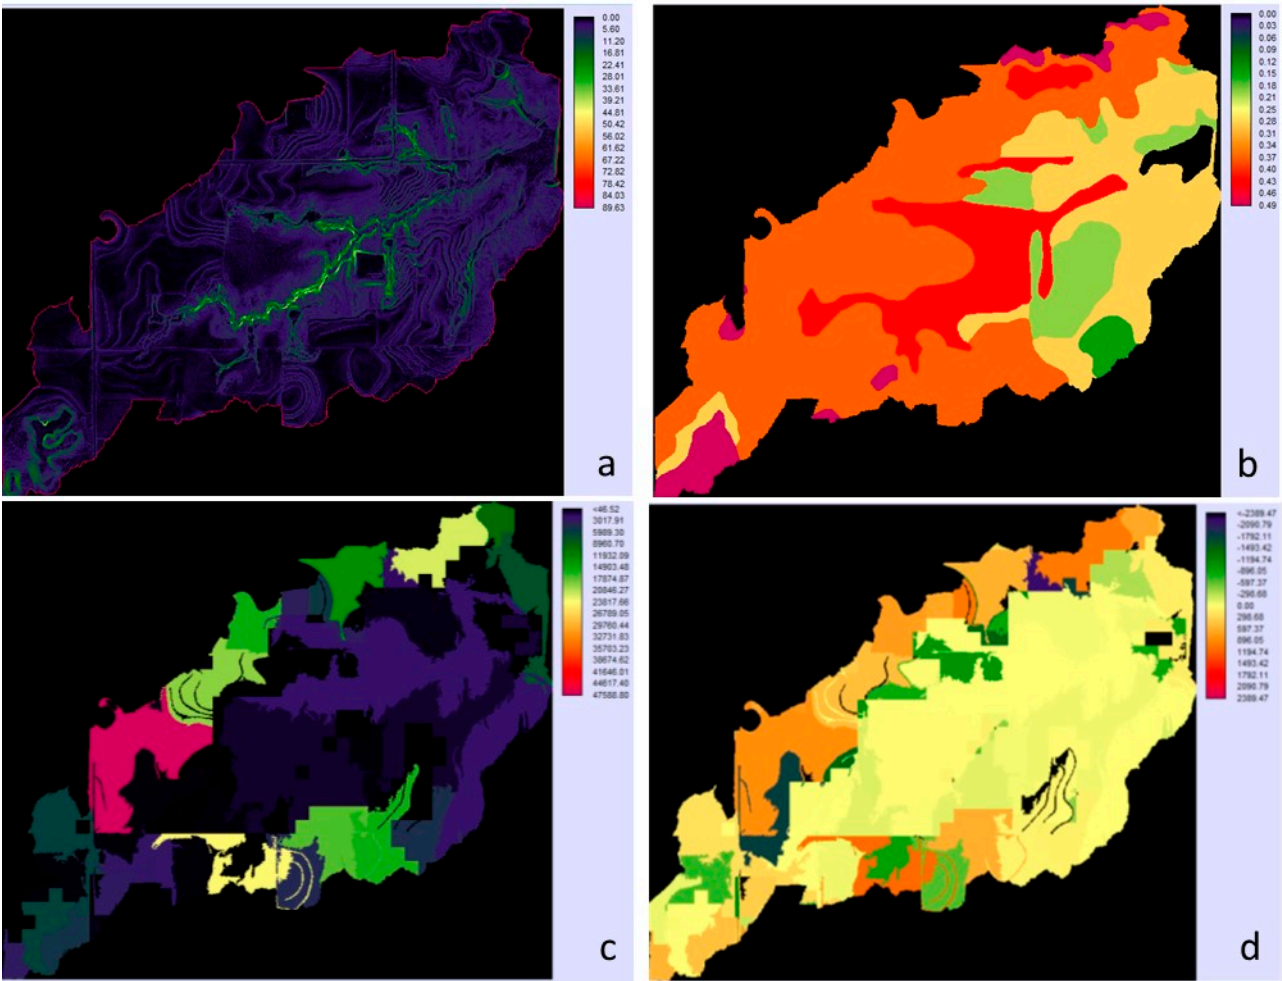

Figure S6. Watershed 23 GIS images of a) slope (deg), b) K-factor [(metric ton\*ha\*hr)/(ha\*MJ\*mm)], c) RUSLE total annual soil loss for each patch (metric tons yr<sup>-1</sup>), and d) SEDIMENTATION net annual soil loss for each patch (metric tons yr<sup>-1</sup>). The total soil loss and net soil loss images are for 1981.



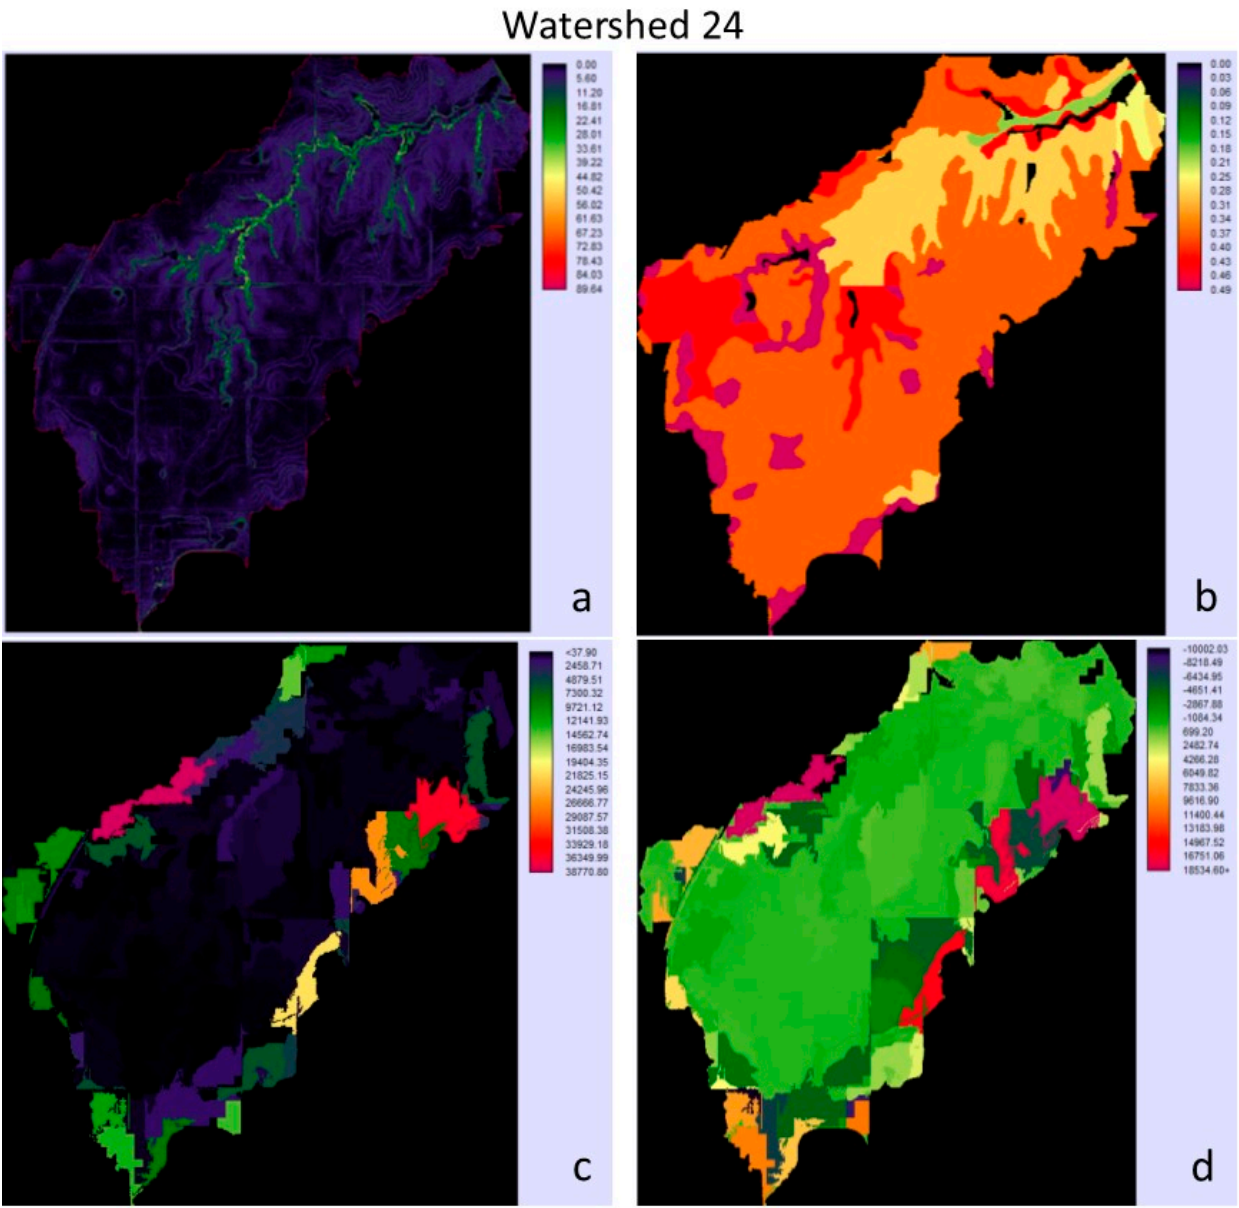

Figure S7. Watershed 24 GIS images of a) slope (deg), b) K-factor  $[(\text{metric ton} \cdot \text{ha} \cdot \text{hr}) / (\text{ha} \cdot \text{MJ} \cdot \text{mm})]$ , c) RUSLE total annual soil loss for each patch (metric tons  $\text{yr}^{-1}$ ), and d) SEDIMENTATION net annual soil loss for each patch (metric tons  $\text{yr}^{-1}$ ). The total soil loss and net soil loss images are for 1981.

162  
163  
164  
165  
166

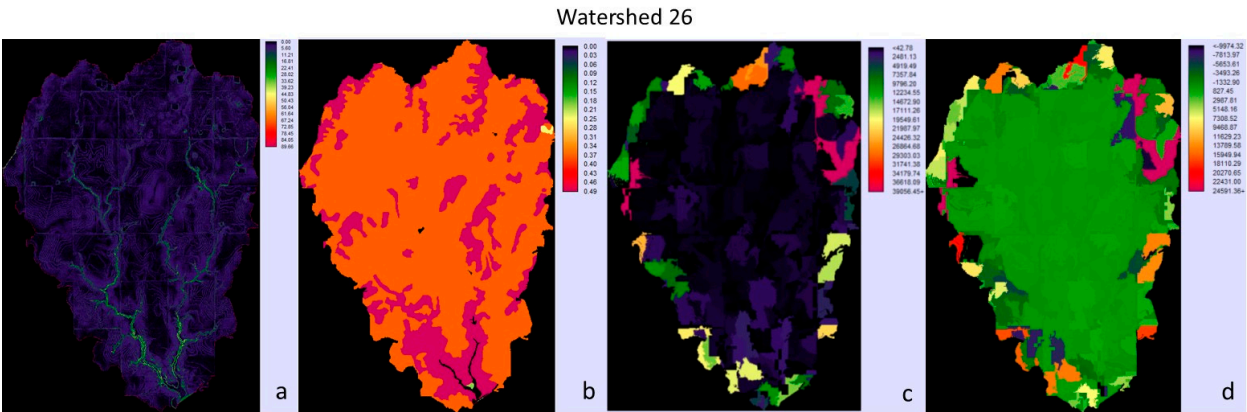

Figure S8. Watershed 26 GIS images of a) slope (deg), b) K-factor  $[(\text{metric ton} \cdot \text{ha} \cdot \text{hr}) / (\text{ha} \cdot \text{MJ} \cdot \text{mm})]$ , c) RUSLE total annual soil loss for each patch (metric tons  $\text{yr}^{-1}$ ), and d) SEDIMENTATION net annual soil loss for each patch (metric tons  $\text{yr}^{-1}$ ). The total soil loss and net soil loss images are for 1981.

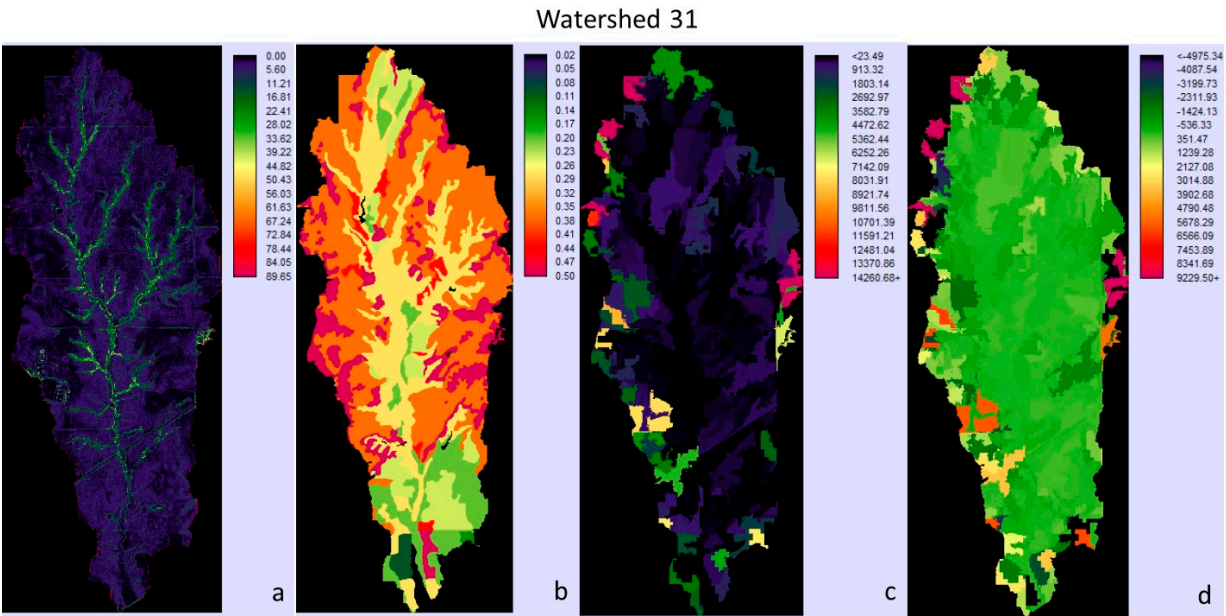

Figure S9. Watershed 31 GIS images of a) slope (deg), b) K-factor  $[(\text{metric ton} \cdot \text{ha} \cdot \text{hr}) / (\text{ha} \cdot \text{MJ} \cdot \text{mm})]$ , c) RUSLE total annual soil loss for each patch (metric tons  $\text{yr}^{-1}$ ), and d) SEDIMENTATION net annual soil loss for each patch (metric tons  $\text{yr}^{-1}$ ). The total soil loss and net soil loss images are for 1981.

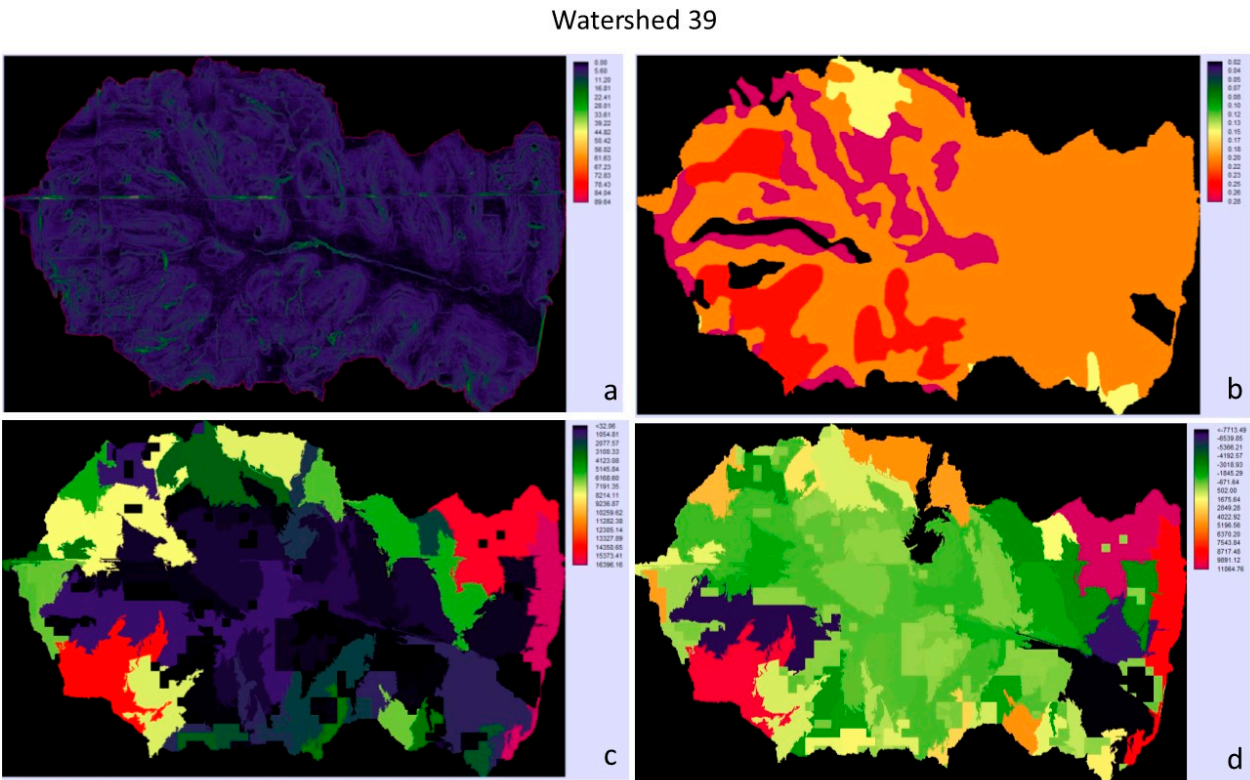

Figure S10. Watershed 39 GIS images of a) slope (deg), b) K-factor  $[(\text{metric ton} \cdot \text{ha} \cdot \text{hr}) / (\text{ha} \cdot \text{MJ} \cdot \text{mm})]$ , c) RUSLE total annual soil loss for each patch (metric tons yr<sup>-1</sup>), and d) SEDIMENTATION net annual soil loss for each patch (metric tons yr<sup>-1</sup>). The total soil loss and net soil loss images are for 1981.

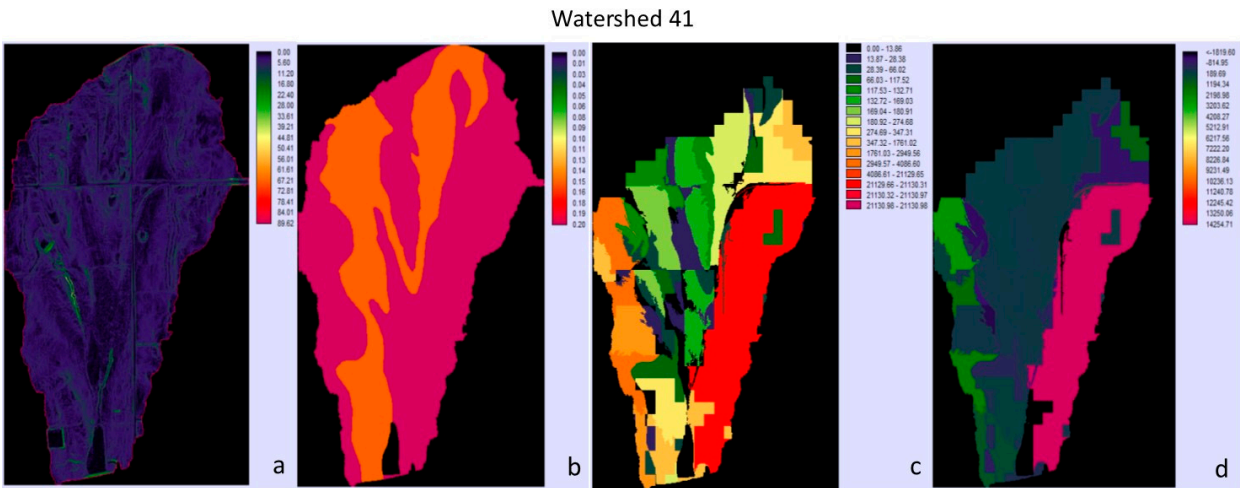

Figure S11. Watershed 41 GIS images of a) slope (deg), b) K-factor  $[(\text{metric ton} \cdot \text{ha} \cdot \text{hr}) / (\text{ha} \cdot \text{MJ} \cdot \text{mm})]$ , c) RUSLE total annual soil loss for each patch (metric tons yr<sup>-1</sup>), and d) SEDIMENTATION net annual soil loss for each patch (metric tons yr<sup>-1</sup>). The total soil loss and net soil loss images are for 1981.



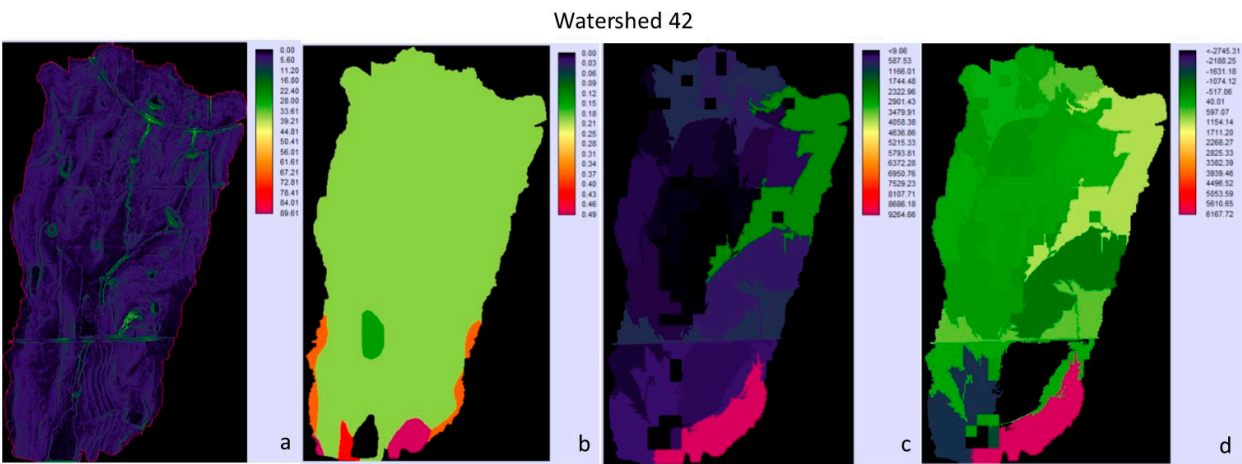

Figure S12. Watershed 42 GIS images of a) slope (deg), b) K-factor  $[(\text{metric ton} \cdot \text{ha} \cdot \text{hr}) / (\text{ha} \cdot \text{MJ} \cdot \text{mm})]$ , c) RUSLE total annual soil loss for each patch (metric tons  $\text{yr}^{-1}$ ), and d) SEDIMENTATION net annual soil loss for each patch (metric tons  $\text{yr}^{-1}$ ). The total soil loss and net soil loss images are for 1981.

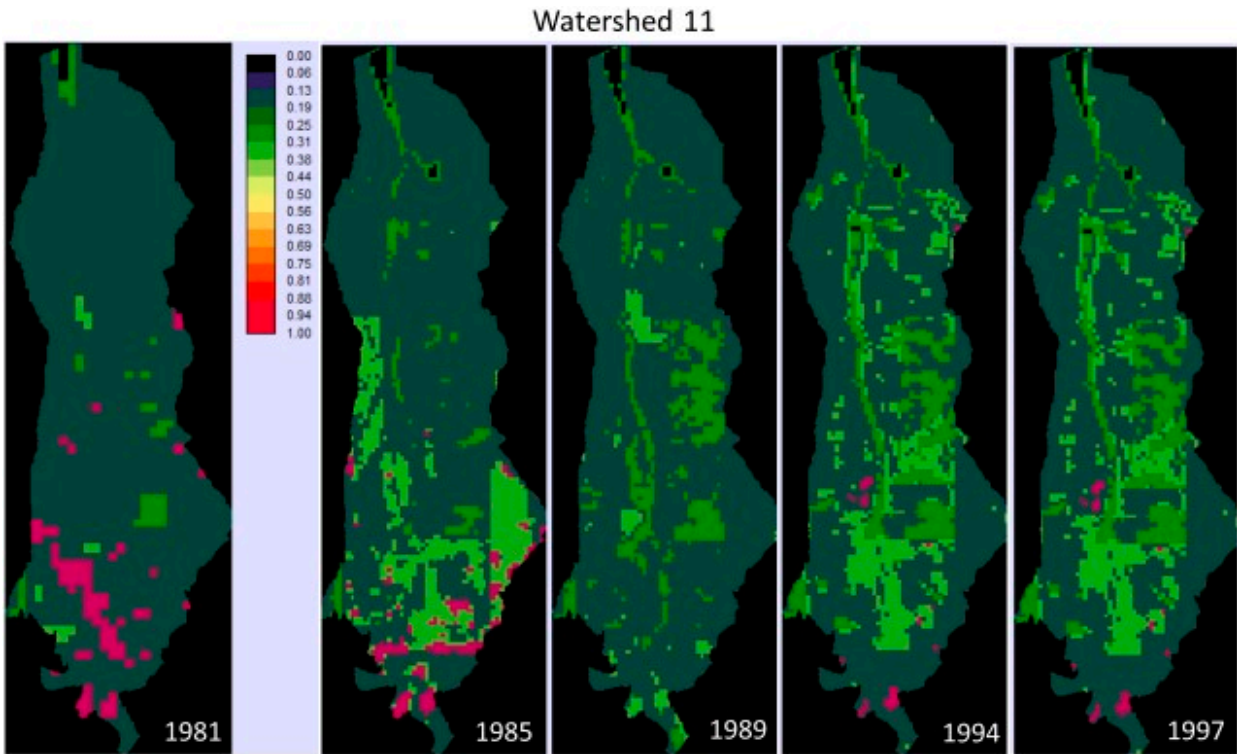

Figure S13. C-factor images for Watershed 11.

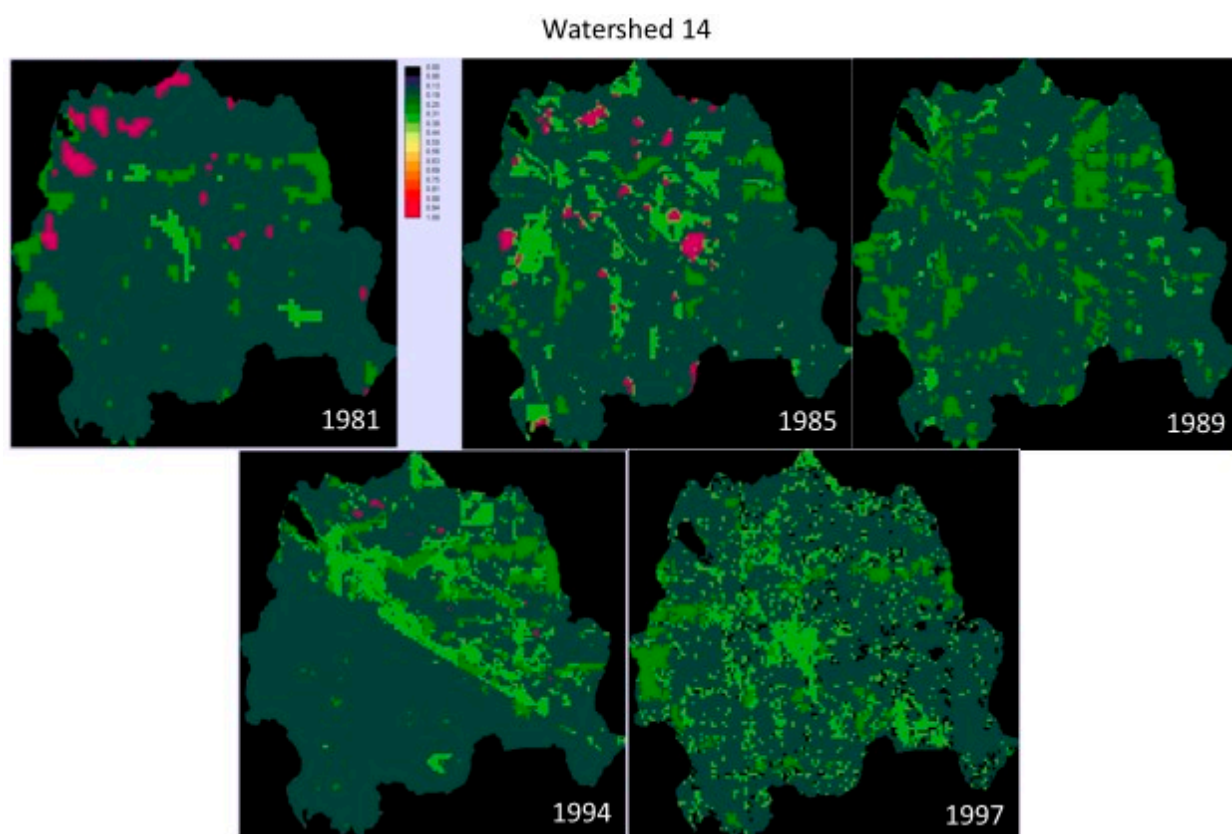

Figure S14. C-factor images for Watershed 14.

201

202

203

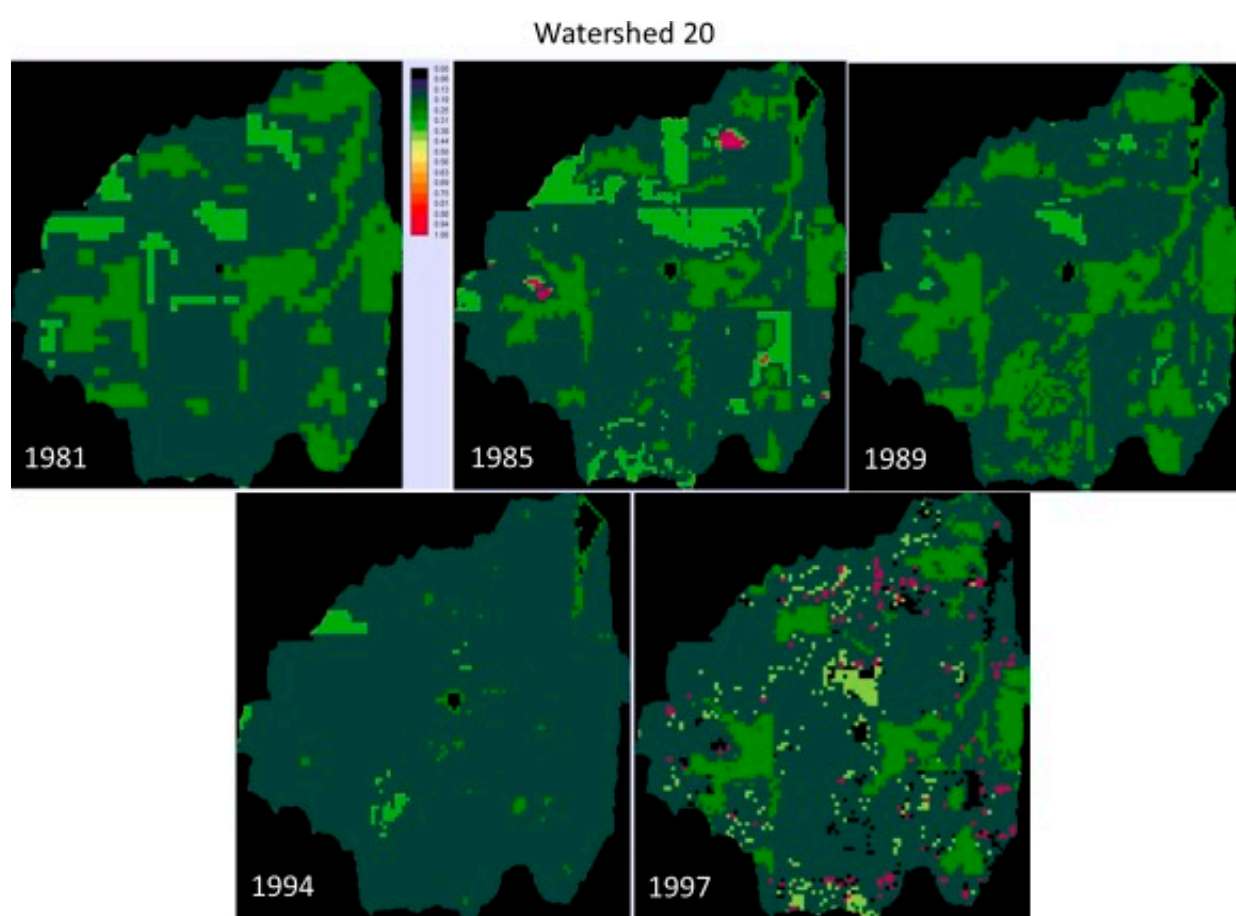

Figure S15. C-factor images for Watershed 20.

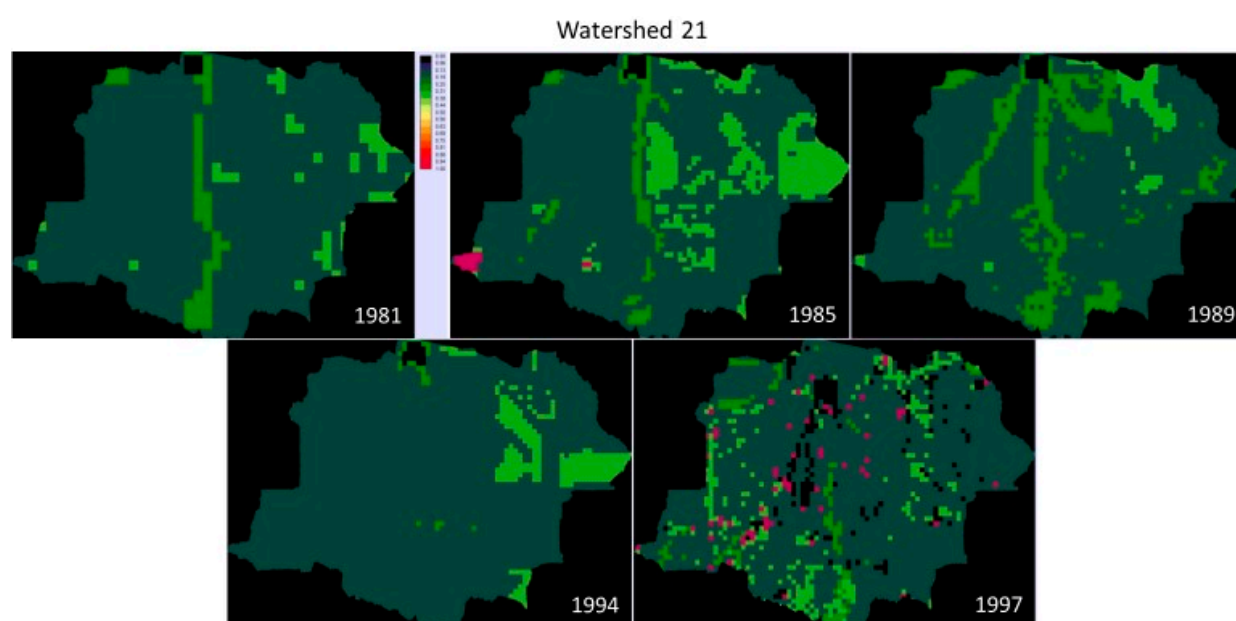

Figure S16. C-factor images for Watershed 21.

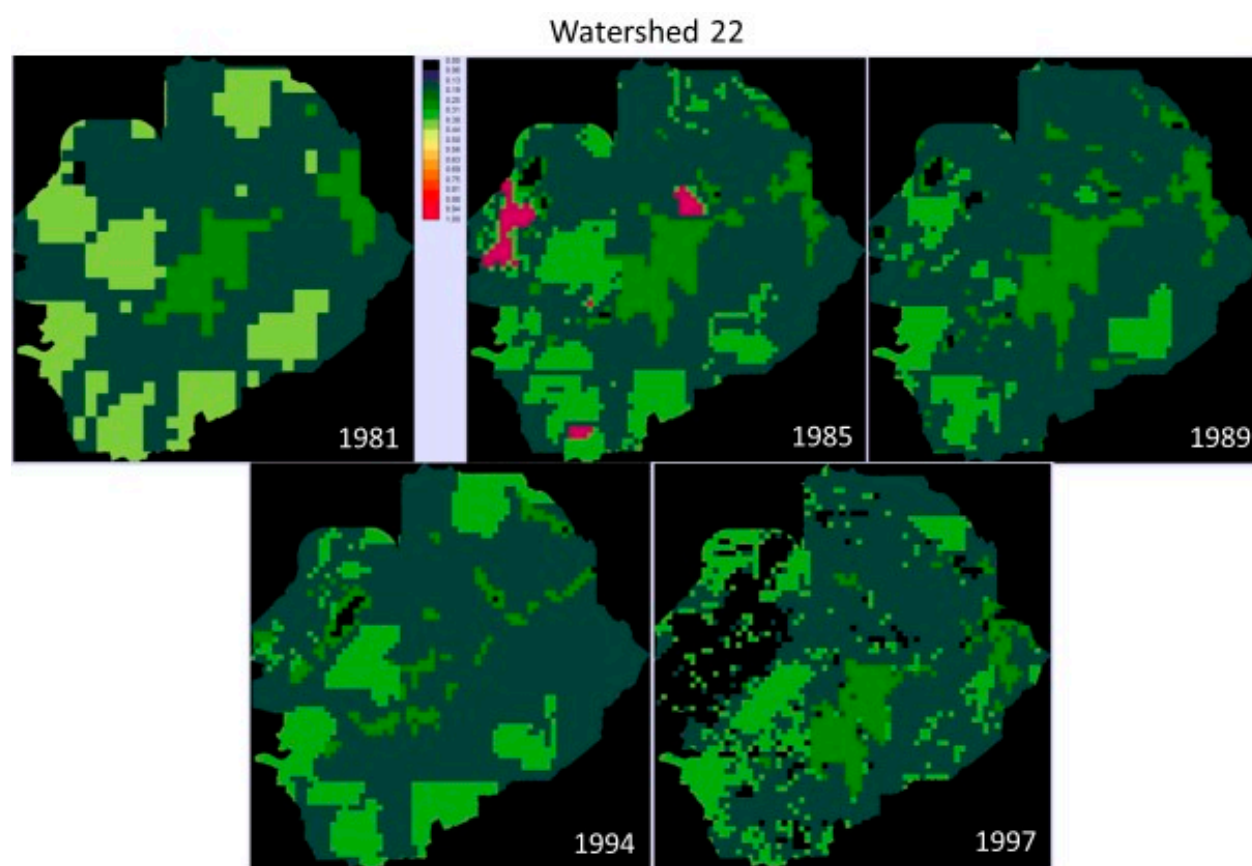

Figure S17. C-factor images for Watershed 22.

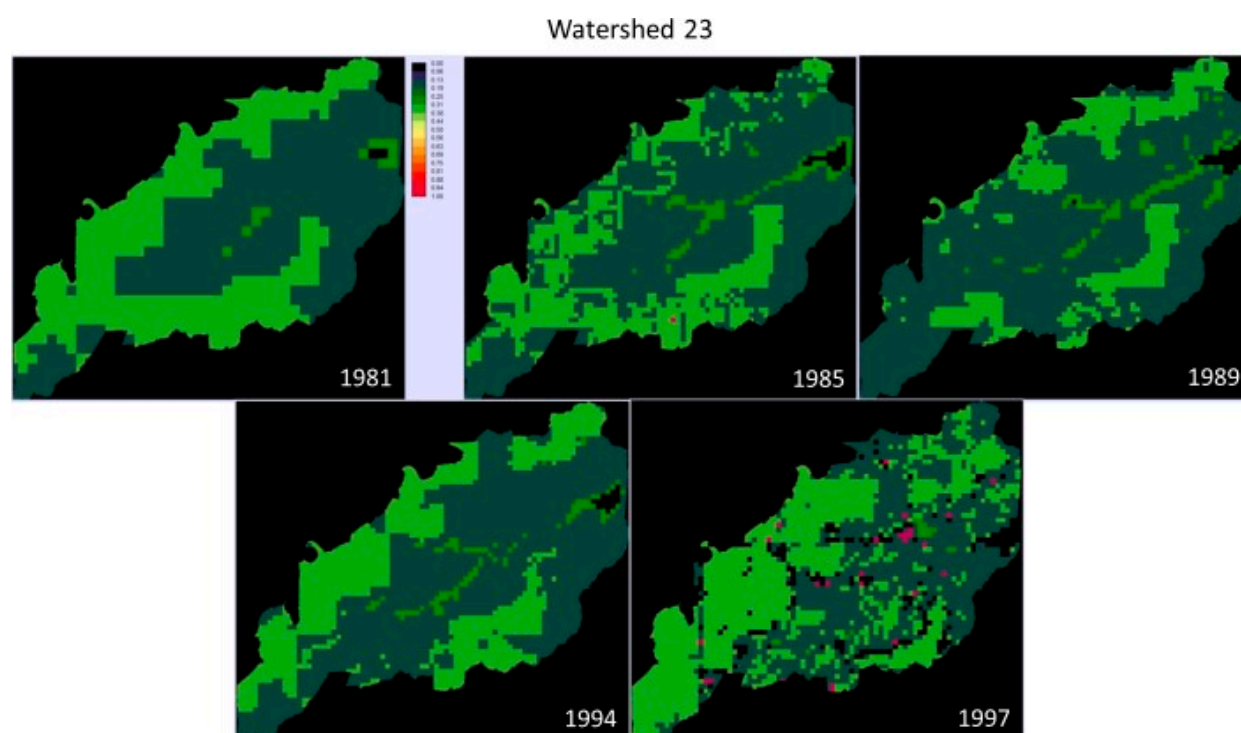

Figure S18. C-factor images for Watershed 23.



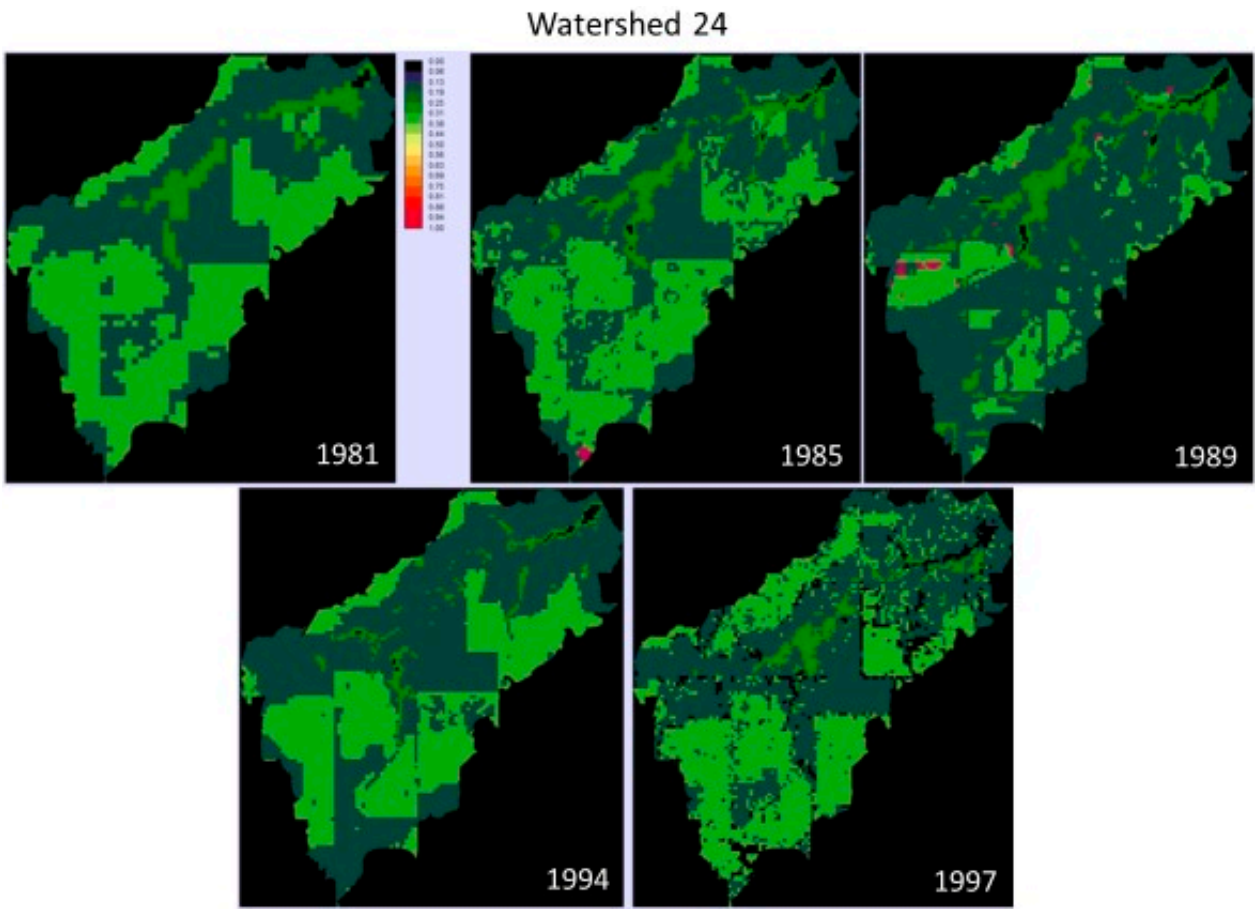

Figure S19. C-factor images for Watershed 24.

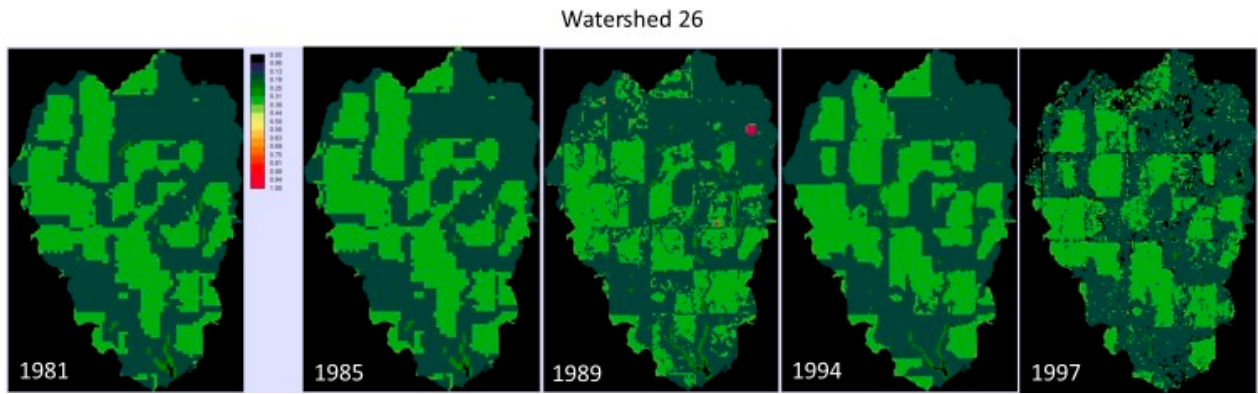

Figure S20. C-factor images for Watershed 26.



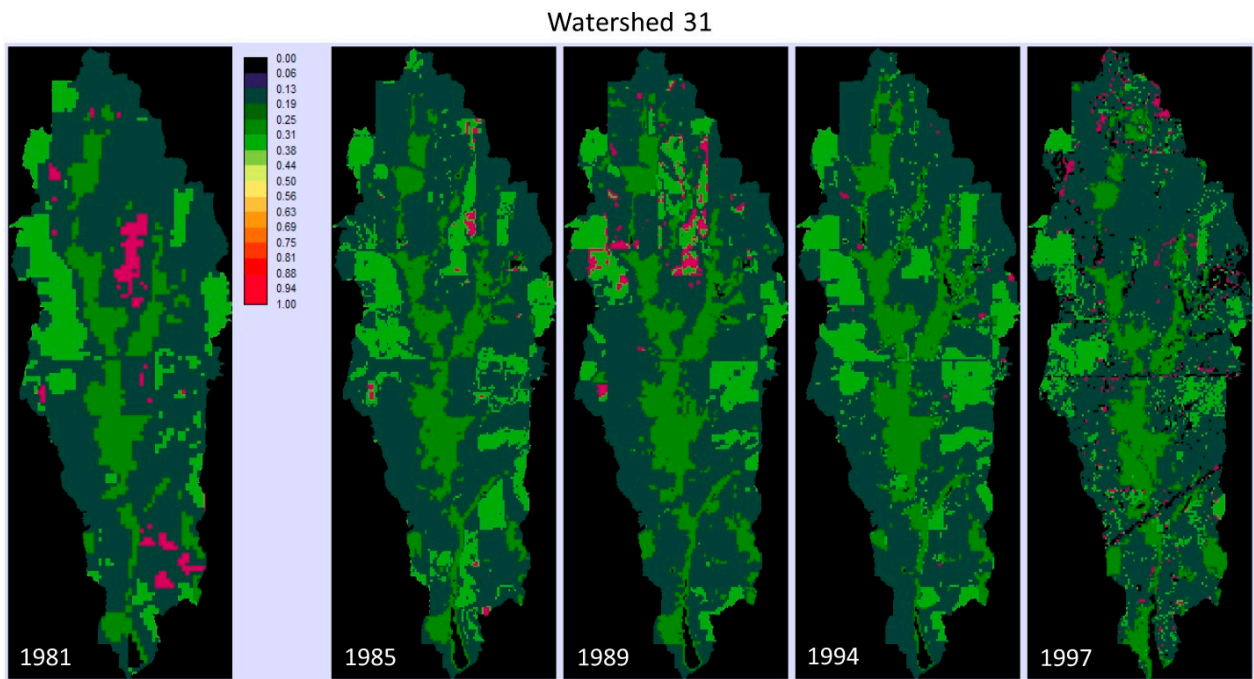

Figure S21. C-factor images for Watershed 31.

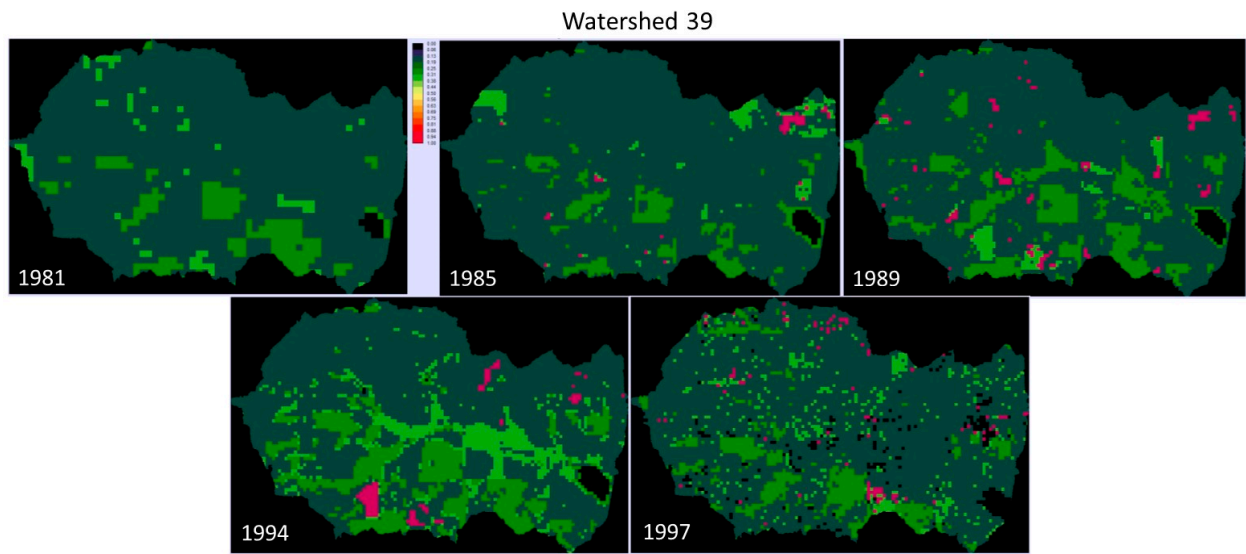

Figure S22. C-factor images for Watershed 39.

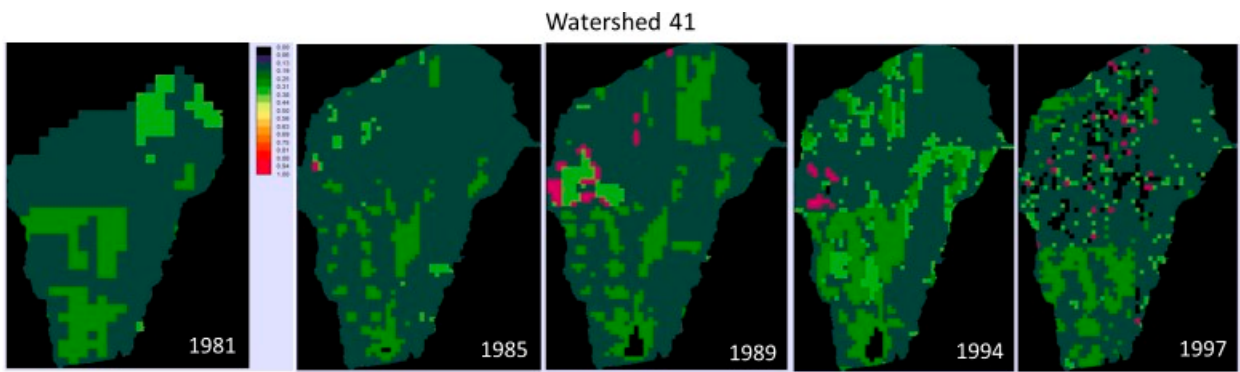

Figure S23. C-factor images for Watershed 41.

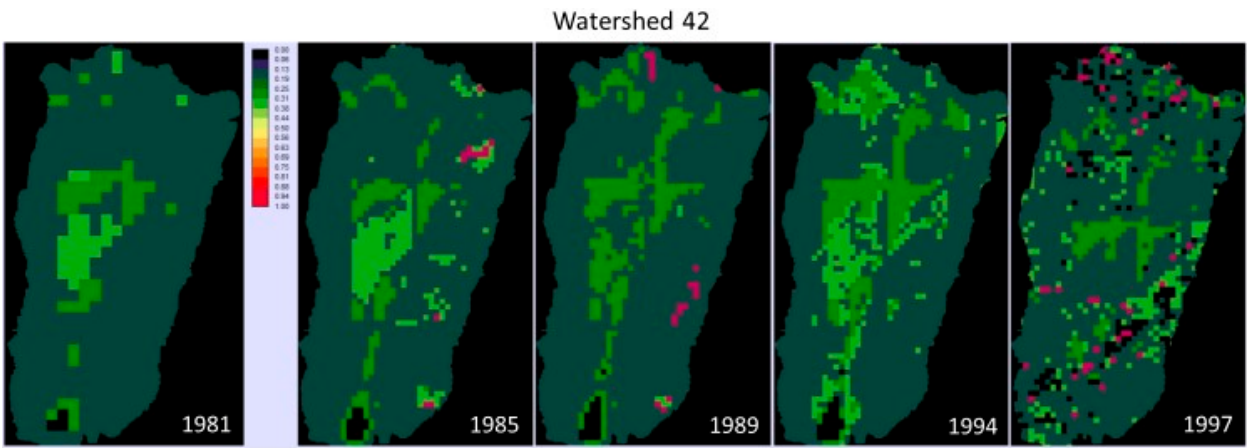

Figure S24. C-factor images for Watershed 42.
